# Supplementary material for: Targeting host deoxycytidine kinase mitigates Staphylococcus aureus abscess formation
Source: eLife journal article supplement (doi:10.7554/elife.91157), 2023-10-11
Supplement: fig2-data1 [file Figure 2A.xlsx]

## Sheet: Tabelle1
	7.7	27.1	9.8	9.2	6.8
	8.2	19.1	12.4	5.2	14.9
	8.1	38.1	11.9	13.9	6.7
dAdo	-	+	+	-	+
(R)-DI-87	-	-	+	+	-
U937	WT	WT	WT	WT	DCK-/-
