# Supplementary material for: Targeting host deoxycytidine kinase mitigates Staphylococcus aureus abscess formation
Source: eLife journal article supplement (doi:10.7554/elife.91157), 2023-10-11
Supplement: fig2-data1 [file Figure 2B.xlsx]

## Sheet: Tabelle1
	9.1	77.4	20	9	8
	6.6	73.2	12.7	9.1	5.7
	7.1	68.9	9.9	5.6	7.5
dGuo	-	+	+	-	+
(R)-DI-87	-	-	+	+	-
U937	WT	WT	WT	WT	DCK-/-
