# Supplementary material for: Targeting host deoxycytidine kinase mitigates Staphylococcus aureus abscess formation
Source: eLife journal article supplement (doi:10.7554/elife.91157), 2023-10-11
Supplement: fig2-data1 [file Figure 2C.xlsx]

## Sheet: Tabelle1
	8.9	30.8	12.2	12.3	9
	9	28.9	10.6	7.1	8.9
	7.1	22.3	7.8	5.9	7.1
dAdo	-	+	+	-	+
(R)-DI-87	-	-	+	+	-
U937	WT	WT	WT	WT	DCK-/-
