# Supplementary material for: Targeting host deoxycytidine kinase mitigates Staphylococcus aureus abscess formation
Source: eLife journal article supplement (doi:10.7554/elife.91157), 2023-10-11
Supplement: fig2-data1 [file Figure 2D.xlsx]

## Sheet: Tabelle1
	7.2	87.5	12.3	11.1	10.9
	7.2	85.3	10.6	11.2	13.8
	4.9	86.7	9.1	5.8	7.6
dGuo	-	+	+	-	+
(R)-DI-87	-	-	+	+	-
U937	WT	WT	WT	WT	DCK-/-
