# Supplementary material for: Targeting host deoxycytidine kinase mitigates Staphylococcus aureus abscess formation
Source: eLife journal article supplement (doi:10.7554/elife.91157), 2023-10-11
Supplement: fig2-data1 [file Figure 2E.xlsx]

## Sheet: Tabelle1
	12.1	37.3	23.1	13.9
	24.4	36.9	23.6	25.3
	17.1	27.3	12.5	21
	21.7	28.4	15.3	9.7
dAdo	-	+	+	-
(R)-DI-87	-	-	+	+
