# Supplementary material for: Targeting host deoxycytidine kinase mitigates Staphylococcus aureus abscess formation
Source: eLife journal article supplement (doi:10.7554/elife.91157), 2023-10-11
Supplement: fig2-data1 [file Figure 2F.xlsx]

## Sheet: Tabelle1
	14.8	40.5	22.3	16.1
	22.5	50.3	22.2	20.2
	17.9	36	22.1	15.5
dGuo	-	+	+	-
(R)-DI-87	-	-	+	+
