# Supplementary material for: Targeting host deoxycytidine kinase mitigates Staphylococcus aureus abscess formation
Source: eLife journal article supplement (doi:10.7554/elife.91157), 2023-10-11
Supplement: fig2-data1 [file Figure 2G.xlsx]

## Sheet: Tabelle1
	6.6	15.7	8.3	10.4
	5.3	18.9	7.2	9.1
	4.9	18.8	5.1	2.3
dAdo	-	+	+	-
(R)-DI-87	-	-	+	+
