# Supplementary material for: Targeting host deoxycytidine kinase mitigates Staphylococcus aureus abscess formation
Source: eLife journal article supplement (doi:10.7554/elife.91157), 2023-10-11
Supplement: fig2-data1 [file Figure 2H.xlsx]

## Sheet: Tabelle1
	5.1	21	9.5	10
	7	23.2	5.9	4.9
	7.9	19.9	6.7	7.8
dGuo	-	+	+	-
(R)-DI-87	-	-	+	+
