# Supplementary material for: Targeting host deoxycytidine kinase mitigates Staphylococcus aureus abscess formation
Source: eLife journal article supplement (doi:10.7554/elife.91157), 2023-10-11
Supplement: fig2-data1 [file Figure 2I.xlsx]

## Sheet: Tabelle1
	9.4	12.2	11.2	10.3	11.4	19.6	8.5	9.7
	8.4	11.1	6.7	10.1	8.1	31.3	7.3	5.5
	7.9	5.9	8.8	10	7.9	15.7	5.9	7
dAMP	-	-	-	+	+	+	+	-
rAdsA	-	+	+	-	-	+	+	-
(R)-DI-87	-	-	+	-	+	-	+	+
