# Supplementary material for: Targeting host deoxycytidine kinase mitigates Staphylococcus aureus abscess formation
Source: eLife journal article supplement (doi:10.7554/elife.91157), 2023-10-11
Supplement: fig2-data1 [file Figure 2J.xlsx]

## Sheet: Tabelle1
	12.5	15	9.1	11.4	11.7	26.3	9.5	10.1
	10.3	9.8	8.3	6.7	10.1	28.5	8.5	8.4
	9.5	8.8	7.9	8.3	7.4	33.9	8.4	7.3
dGMP	-	-	-	+	+	+	+	-
rAdsA	-	+	+	-	-	+	+	-
(R)-DI-87	-	-	+	-	+	-	+	+
