# Supplementary material for: Targeting host deoxycytidine kinase mitigates Staphylococcus aureus abscess formation
Source: eLife journal article supplement (doi:10.7554/elife.91157), 2023-10-11
Supplement: fig2-data1 [file Figure 2L.xlsx]

## Sheet: Tabelle1
	14.9	14.2	33.3	13.2	12.2	12.9	13	12.7	11.5	12.2	14.7	13.4
	13.7	13.3	29	15.6	12.8	13.6	12.6	14.2	12.2	15.1	14	13.5
	10.3	11.9	37.6	11.9	12.7	12.8	11.3	10.5	14.4	13.1	13.2	11.1
dGMP	-	+	+	-	+	-	+	-	+	-	-	+
S. aureus	-	-	WT	WT	adsA	adsA	WT	WT	adsA	adsA	-	-
(R)-DI-87	-	-	-	-	-	-	+	+	+	+	+	+
