# Supplementary material for: Targeting host deoxycytidine kinase mitigates Staphylococcus aureus abscess formation
Source: eLife journal article supplement (doi:10.7554/elife.91157), 2023-10-11
Supplement: fig2-figsupp1-data1 [file Figure 2-figure supplement 1A.xlsx]

## Sheet: Tabelle1
	7.3	8.7	23.2	25.7	21.8	13.1	9.9	9.4
	5.8	9.1	27.7	23.3	19.9	14.6	7.7	6.7
	3.3	5.7	26.8	22.2	19.1	18.4	12.4	8.8
dAdo	-	-	+	+	+	+	+	+
(R)-DI-87 (µM)	0	1	0	0.0001	0.001	0.01	0.1	1
