# Supplementary material for: Targeting host deoxycytidine kinase mitigates Staphylococcus aureus abscess formation
Source: eLife journal article supplement (doi:10.7554/elife.91157), 2023-10-11
Supplement: fig2-figsupp1-data1 [file Figure 2-figure supplement 1B.xlsx]

## Sheet: Tabelle1
	10.7	9.9	75.8	76.4	64.3	55.7	31.7	21.1
	6.8	5.1	80.7	78.2	62.1	48.8	28.8	16.6
	6	13.2	82.2	76.1	68.8	58.2	25.8	14.1
dGuo	-	-	+	+	+	+	+	+
(R)-DI-87 (µM)	0	1	0	0.0001	0.001	0.01	0.1	1
