# Supplementary material for: Targeting host deoxycytidine kinase mitigates Staphylococcus aureus abscess formation
Source: eLife journal article supplement (doi:10.7554/elife.91157), 2023-10-11
Supplement: fig2-figsupp1-data1 [file Figure 2-figure supplement 1C.xlsx]

## Sheet: Tabelle1
	4.2	3.5	18.3	20.9	15.1	14.8	13.5	8.2
	9.7	12.3	30.8	22.5	20.8	14.1	13	12.2
	10.9	9.8	26.7	22.8	18.2	17.1	11.4	9.6
dAdo	-	-	+	+	+	+	+	+
(R)-DI-87 (µM)	0	1	0	0.0001	0.001	0.01	0.1	1
