# Supplementary material for: Targeting host deoxycytidine kinase mitigates Staphylococcus aureus abscess formation
Source: eLife journal article supplement (doi:10.7554/elife.91157), 2023-10-11
Supplement: fig2-figsupp1-data1 [file Figure 2-figure supplement 1D.xlsx]

## Sheet: Tabelle1
	7.5	11.1	87.7	83.1	78.8	53.1	32.7	12.6
	12.2	14.2	82.2	78.1	75.5	60.2	29.9	15.5
	13.5	11.2	85.9	86.1	80.4	55.1	34.2	13.3
dGuo	-	-	+	+	+	+	+	+
(R)-DI-87 (µM)	0	1	0	0.0001	0.001	0.01	0.1	1
