# Supplementary material for: Targeting host deoxycytidine kinase mitigates Staphylococcus aureus abscess formation
Source: eLife journal article supplement (doi:10.7554/elife.91157), 2023-10-11
Supplement: fig3-data3 [file Figure 3A.xlsx]

## Sheet: Tabelle1
	0.067	0.199	0.103	0.091	0.087
	0.088	0.209	0.09	0.108	0.121
	0.111	0.143	0.117	0.056	0.096
dAdo	-	+	+	-	+
(R)-DI-87	-	-	+	+	-
U937	WT	WT	WT	WT	DCK-/-
