# Supplementary material for: Targeting host deoxycytidine kinase mitigates Staphylococcus aureus abscess formation
Source: eLife journal article supplement (doi:10.7554/elife.91157), 2023-10-11
Supplement: fig3-data3 [file Figure 3B.xlsx]

## Sheet: Tabelle1
	0.055	0.366	0.109	0.098	0.057
	0.081	0.412	0.143	0.092	0.069
	0.103	0.26	0.091	0.107	0.102
dGuo	-	+	+	-	+
(R)-DI-87	-	-	+	+	-
U937	WT	WT	WT	WT	DCK-/-
