# Supplementary material for: Targeting host deoxycytidine kinase mitigates Staphylococcus aureus abscess formation
Source: eLife journal article supplement (doi:10.7554/elife.91157), 2023-10-11
Supplement: fig3-data3 [file Figure 3C.xlsx]

## Sheet: Tabelle1
	0.095	0.221	0.137	0.095	0.099
	0.083	0.19	0.09	0.11	0.116
	0.051	0.294	0.115	0.121	0.069
dAdo	-	+	+	-	+
(R)-DI-87	-	-	+	+	-
U937	WT	WT	WT	WT	DCK-/-
