# Supplementary material for: Targeting host deoxycytidine kinase mitigates Staphylococcus aureus abscess formation
Source: eLife journal article supplement (doi:10.7554/elife.91157), 2023-10-11
Supplement: fig3-data3 [file Figure 3D.xlsx]

## Sheet: Tabelle1
	0.086	0.421	0.112	0.114	0.091
	0.097	0.446	0.089	0.134	0.072
	0.074	0.39	0.131	0.096	0.103
dGuo	-	+	+	-	+
(R)-DI-87	-	-	+	+	-
U937	WT	WT	WT	WT	DCK-/-
