# Supplementary material for: Targeting host deoxycytidine kinase mitigates Staphylococcus aureus abscess formation
Source: eLife journal article supplement (doi:10.7554/elife.91157), 2023-10-11
Supplement: fig4-data1 [file Figure 4A.xlsx]

## Sheet: Tabelle1
	Vehicle	(R)-DI-87	Vehicle	(R)-DI-87	Vehicle	(R)-DI-87	Vehicle	(R)-DI-87	Vehicle	(R)-DI-87	Vehicle	(R)-DI-87	Vehicle	(R)-DI-87	Vehicle	(R)-DI-87	Vehicle	(R)-DI-87
	B220+	B220+	CD4+	CD4+	CD8+	CD8+	CD8+CD11c-	CD8+CD11c-	CD11b+Gr1-	CD11b+Gr1-	CD11c+	CD11c+	CD11c+CD8+	CD11c+CD8+	CD11c+CD8-	CD11c+CD8-	Gr1+CD11b+	Gr1+CD11b+
	52.6	47.6	14.8	13.8	12	10.6	6.34	5.13	2.79	2.4	13.5	12.6	5.13	5.08	2.61	2.37	7.11	11.9
	53.7	55.1	14.9	14.1	10.8	10.5	5.73	5.49	3.29	2	12.3	10.7	4.72	4.47	2.8	1.96	5.36	6.4
	65	54.2	10.2	12.9	8.17	10.9	4.06	5.95	1.36	2.73	8.54	11.4	3.59	4.42	1.91	2.31	5.24	7.71
