# Supplementary material for: Targeting host deoxycytidine kinase mitigates Staphylococcus aureus abscess formation
Source: eLife journal article supplement (doi:10.7554/elife.91157), 2023-10-11
Supplement: fig4-data1 [file Figure 4D.xlsx]

## Sheet: Tabelle1
	Vehicle	(R)-DI-87
	19	20
	18	17
	19	19
	19	19
