# Supplementary material for: Targeting host deoxycytidine kinase mitigates Staphylococcus aureus abscess formation
Source: eLife journal article supplement (doi:10.7554/elife.91157), 2023-10-11
Supplement: fig4-data1 [file Figure 4E.xlsx]

## Sheet: Tabelle1
	Vehicle	(R)-DI-87
	0.682	1.363
	0.641	1.588
	0.612	1.517
	0.634	1.257
