# Supplementary material for: Targeting host deoxycytidine kinase mitigates Staphylococcus aureus abscess formation
Source: eLife journal article supplement (doi:10.7554/elife.91157), 2023-10-11
Supplement: fig4-data1 [file Figure 4F.xlsx]

## Sheet: Tabelle1
	Vehicle	(R)-DI-87	Vehicle	(R)-DI-87
S. aureus	WT	WT	adsA	adsA
	18	10	6	6
	21	0	5	7
	19	6	11	1
	15	13	6	6
	21	1	5	6
	22	9	6	7
	14	2	3	9
	11	2	3	6
