# Supplementary material for: Targeting host deoxycytidine kinase mitigates Staphylococcus aureus abscess formation
Source: eLife journal article supplement (doi:10.7554/elife.91157), 2023-10-11
Supplement: fig4-data1 [file Figure 4G.xlsx]

## Sheet: Tabelle1
	Vehicle	Vehicle	Vehicle			(R)-DI-87	(R)-DI-87	(R)-DI-87
S. aureus	WT	WT	WT		S. aureus	WT	WT	WT
	left kidney	right kidney	abscesses per kidney			left kidney	right kidney	abscesses per kidney
			(values used for figure)					(values used for figure)
	3	11	7			5	4	4.5
	5	8	6.5			4	0	2
	8	12	10			6	2	4
	6	7	6.5			3	1	2
	11	4	7.5			7	1	4
	9	6	7.5			8	4	6
	9	8	8.5			3	4	3.5
	8	0	4			1	1	1
	Vehicle	Vehicle	Vehicle			(R)-DI-87	(R)-DI-87	(R)-DI-87
S. aureus	adsA	adsA	adsA		S. aureus	adsA	adsA	adsA
	left kidney	right kidney	abscesses per kidney			left kidney	right kidney	abscesses per kidney
			(values used for figure)					(values used for figure)
	4	4	4			4	1	2.5
	5	1	3			3	3	3
	4	0	2			1	6	3.5
	1	3	2			2	4	3
	6	2	4			5	3	4
	3	2	2.5			6	0	3
	7	6	6.5			4	4	4
	0	5	2.5			0	1	0.5
