# Supplementary material for: Targeting host deoxycytidine kinase mitigates Staphylococcus aureus abscess formation
Source: eLife journal article supplement (doi:10.7554/elife.91157), 2023-10-11
Supplement: fig4-data1 [file Figure 4H.xlsx]

## Sheet: Tabelle1
	Vehicle	(R)-DI-87	Vehicle	(R)-DI-87
S. aureus	WT	WT	adsA	adsA
	CFU/gram tissue	CFU/gram tissue	CFU/gram tissue	CFU/gram tissue
	7.88177e+07	5.18072e+07	4.25697e+06	2.02265e+07
	2.11765e+08	62893.1	6.54297e+07	1.80939e+07
	8.061e+07	5.40541e+07	1.30178e+07	140562
	1.19266e+08	9.11111e+07	1.19276e+07	2.24967e+07
	5.04967e+08	427350	1.27874e+07	16406250
	5.75101e+08	4.58015e+07	7.9235e+06	2.11382e+07
	2.63158e+08	1.01115e+07	73770.5	7.94492e+06
	2.11161e+08	6.01093e+07	1.02623e+07	1.18199e+08
