# Supplementary material for: Targeting host deoxycytidine kinase mitigates Staphylococcus aureus abscess formation
Source: eLife journal article supplement (doi:10.7554/elife.91157), 2023-10-11
Supplement: fig4-data1 [file Figure 4I.xlsx]

## Sheet: Tabelle1
	Vehicle	(R)-DI-87	Vehicle	(R)-DI-87
S. aureus	WT	WT	adsA	adsA
	CFU/gram tissue	CFU/gram tissue	CFU/gram tissue	CFU/gram tissue
	7.10059e+08	5.14337e+07	1.79795e+07	5.4007e+07
	2.57732e+08	1.96552e+07	9.42446e+07	2.03647e+06
	1.63934e+08	2.26721e+07	4.09836e+07	2.88221e+07
	7.18954e+07	2.69231e+07	2.52595e+07	1.6573e+07
	6.15942e+07	1.79104e+06	2.31818e+07	4.11602e+07
	4.45736e+07	7.75956e+07	169492	2.49322e+07
	1.53846e+08	2.83784e+07	3.59494e+07	3.15068e+07
	8.20611e+07	59139.8	262172	4.78788e+07
