# Supplementary material for: Targeting host deoxycytidine kinase mitigates Staphylococcus aureus abscess formation
Source: eLife journal article supplement (doi:10.7554/elife.91157), 2023-10-11
Supplement: fig4-figsupp1-data1 [file Figure 4-figure supplement 1.xlsx]

## Sheet: Tabelle1
	Vehicle	(R)-DI-87	Vehicle	(R)-DI-87	Vehicle	(R)-DI-87	Vehicle	(R)-DI-87	Vehicle	(R)-DI-87
	B220+	B220+	CD4+	CD4+	CD8+	CD8+	Gr1+CD11b+	Gr1+CD11b+	CD11c+	CD11c+
	51.7	52.3	22.6	21.2	12.5	12.3	2.91	1.8	15	15.9
	56	53	13.2	19.1	11.4	12.7	0.71	2.16	11.7	15.8
	49.4	53.3	22.4	19.1	15	13.4	0.68	1.02	11.8	13.5
	53.4	47.9	20.1	19.6	13.1	13.5	4.45	5.09	12.9	15.5
