# Supplementary material for: Targeting host deoxycytidine kinase mitigates Staphylococcus aureus abscess formation
Source: eLife journal article supplement (doi:10.7554/elife.91157), 2023-10-11
Supplement: fig4-figsupp2-data1 [file Figure 4-figure supplement 2A.xlsx]

## Sheet: Tabelle1
S. aureus	WT	WT	adsA	adsA
(R)-DI-87	-	+	-	+
	96.6	102	54.6	52.5
	82.4	84.7	42.9	49.4
	106.5	120.3	41.4	40.3
