# Supplementary material for: Targeting host deoxycytidine kinase mitigates Staphylococcus aureus abscess formation
Source: eLife journal article supplement (doi:10.7554/elife.91157), 2023-10-11
Supplement: fig4-figsupp2-data1 [file Figure 4-figure supplement 2B.xlsx]

## Sheet: Tabelle1
S. aureus	WT	WT	adsA	adsA
(R)-DI-87	-	+	-	+
	24.2	27.7	17.3	18.8
	30.5	33.1	21.5	19.5
	26.7	29.1	19.4	17.4
