# Supplementary material for: Targeting host deoxycytidine kinase mitigates Staphylococcus aureus abscess formation
Source: eLife journal article supplement (doi:10.7554/elife.91157), 2023-10-11
Supplement: fig5-data1 [file Figure 5Q.xlsx]

## Sheet: Tabelle1
	10.4	18.6	11.7	7.2
	14.5	22.5	14	13.4
	11	26.1	13.5	7.2
dAdo	-	+	+	-
(R)-DI-87	-	-	+	+
