# Supplementary material for: Targeting host deoxycytidine kinase mitigates Staphylococcus aureus abscess formation
Source: eLife journal article supplement (doi:10.7554/elife.91157), 2023-10-11
Supplement: fig5-data1 [file Figure 5R.xlsx]

## Sheet: Tabelle1
	8.6	26.6	13.6	12.2
	11.4	35.2	18.7	12.5
	15.3	26.2	16.8	12.8
dGuo	-	+	+	-
(R)-DI-87	-	-	+	+
