# Supplementary material for: Targeting host deoxycytidine kinase mitigates Staphylococcus aureus abscess formation
Source: eLife journal article supplement (doi:10.7554/elife.91157), 2023-10-11
Supplement: fig5-figsupp1-data1 [file Figure 5-figure supplement 1A.xlsx]

## Sheet: Tabelle1
	11.6	21.9	10.7	7.4
	11.2	18.1	6.9	8.1
	12.9	24.5	10.6	12.1
dAdo	-	+	+	-
(R)-DI-87	-	-	+	+
