# Supplementary material for: Targeting host deoxycytidine kinase mitigates Staphylococcus aureus abscess formation
Source: eLife journal article supplement (doi:10.7554/elife.91157), 2023-10-11
Supplement: fig5-figsupp1-data1 [file Figure 5-figure supplement 1B.xlsx]

## Sheet: Tabelle1
	12.2	29.4	11.9	9.2
	8.2	24.2	7.8	9.9
	8.8	29.8	14.5	12.5
dGuo	-	+	+	-
(R)-DI-87	-	-	+	+
