# Supplementary figures and images for: Targeting host deoxycytidine kinase mitigates Staphylococcus aureus abscess formation
Source: eLife journal article supplement (doi:10.7554/elife.91157), 2023-10-11

Figure 3E

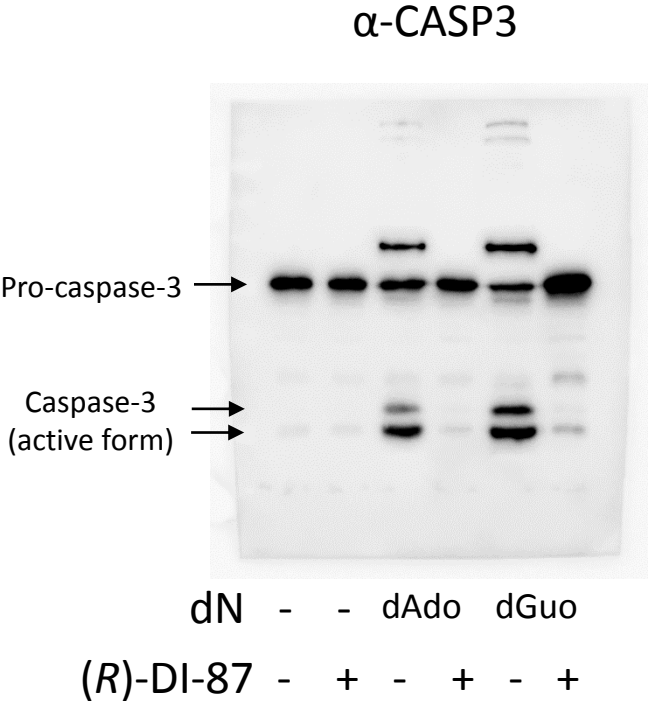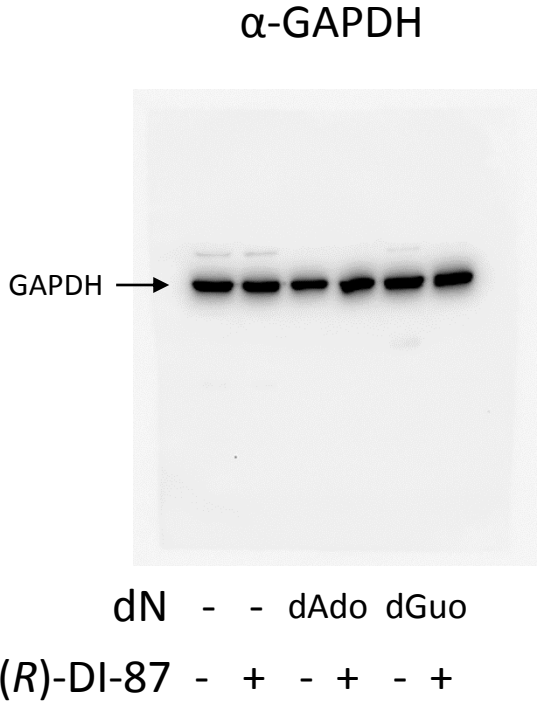

Supplement: fig3-data2 [file elife-91157-fig3-data2-v1.zip]

Figure 3F

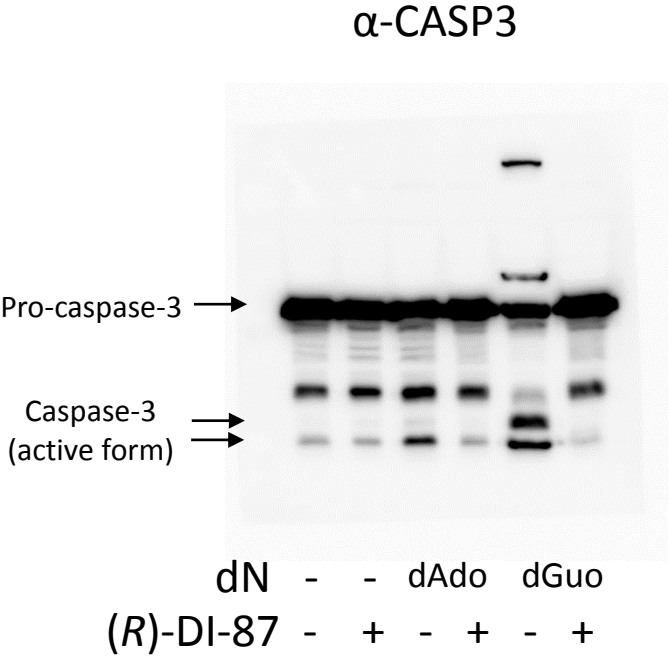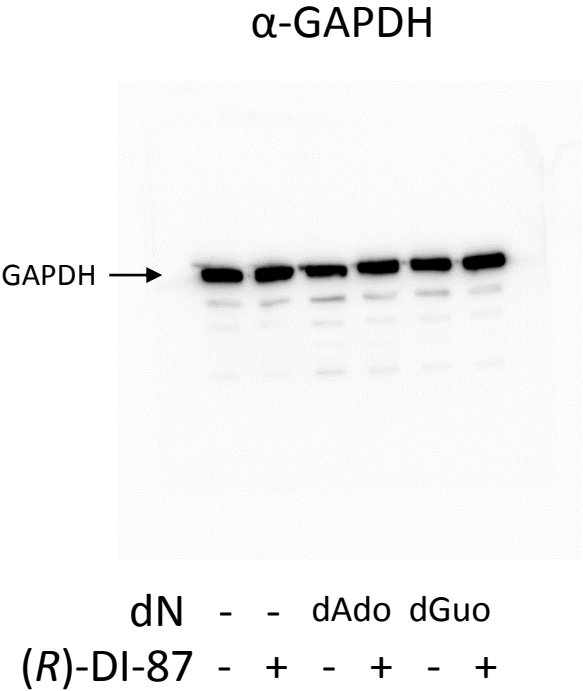

Supplement: fig3-data2 [file elife-91157-fig3-data2-v1.zip]
